# Supplementary material
Source: Copernicus journal article supplement (doi:10.5194/bg-23-4227-2026)
Supplement: Supplementary file 1 [file bg-23-4227-2026-supplement.pdf]

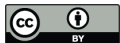

*Supplement of*

## **Macroalgal influence on particulate organic matter sources and early transformation in an Arctic fjord**

**Ashok S. Jagtap et al.**

*Correspondence to:* Ashok S. Jagtap ([ashokjagtap200@gmail.com](mailto:ashokjagtap200@gmail.com)) and Archana Singh ([archanasingh@ncpor.res.in](mailto:archanasingh@ncpor.res.in))

The copyright of individual parts of the supplement might differ from the article licence.

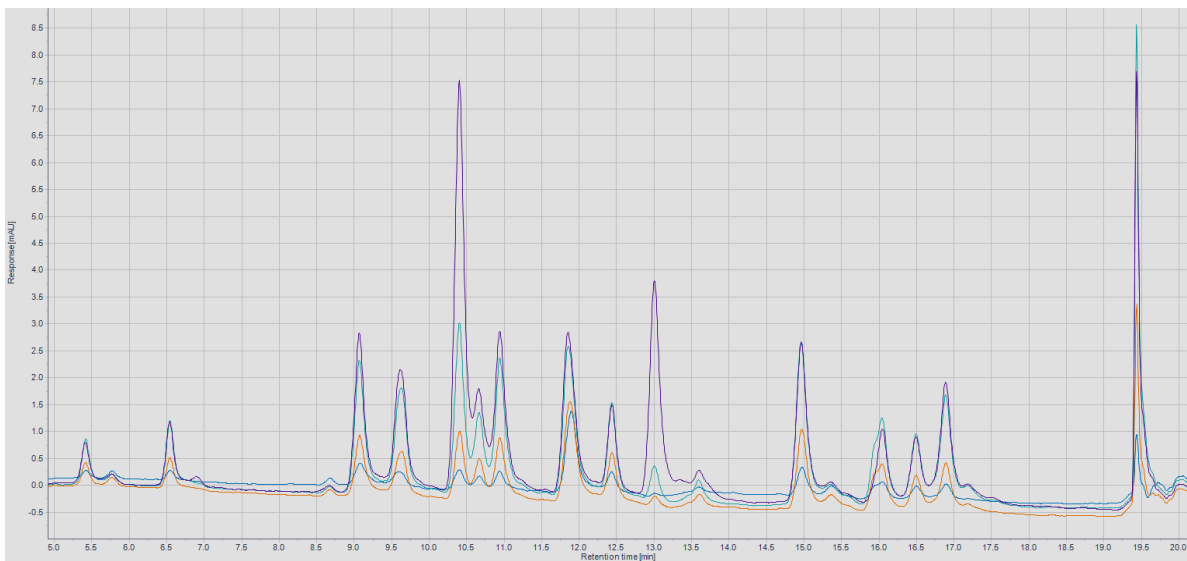

42

43 **Figure S1:** Amino acid standard (sequentially: Aspartate, Glutamate, Serine, Histidine,  
44 Glycine, Threonine, Arginine, Alanine, Tyrosine, Cysteine, Valine, Methionine,  
45 Phenylalanine, Isoleucine, Leucine, Lysine) calibration at 25 pmol (blue line), 100 pmol  
46 (orange line), 250 pmol (sky blue line) and 1 nmol (Purple line) concentration.

47

48

49

50

51

52

53

54

55

56

57

58

59

60

61

62

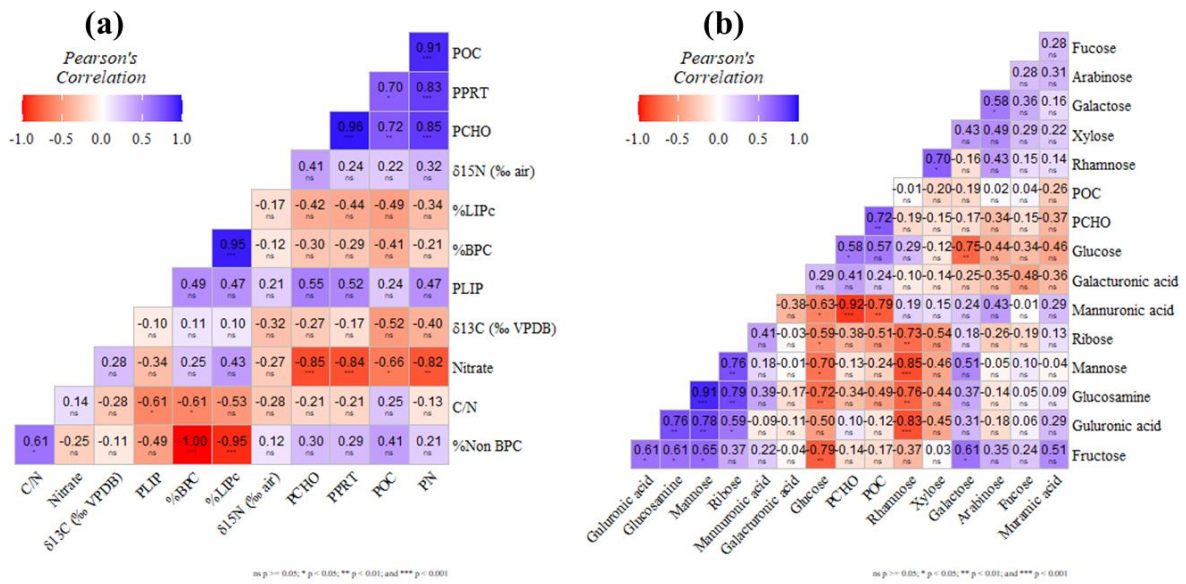

63  
 64 **Figure S2:** Heatmap of Pearson's correlation matrix of biochemical parameters, stable  
 65 isotopes, and nutrient concentrations (a) and biochemical parameters with monosaccharide  
 66 compositions. The heatmap displays correlation coefficients ( $r$ ) from -1.0 (red) to 1.0 (blue),  
 67 with significance levels indicated as: *ns* ( $p \geq 0.05$ ), \* ( $p < 0.05$ ), \*\* ( $p < 0.01$ ), and \*\*\* ( $p < 0.001$ ).

68  
 69  
 70  
 71  
 72  
 73  
 74  
 75  
 76  
 77  
 78  
 79  
 80  
 81  
 82  
 83

84 **Table S1:**

85 Shapiro–Wilk normality tests, Levene's tests for homogeneity of variance and one-way  
86 ANOVA examining the variation in biochemical composition (PCHO, PPRT, BPC, glucose  
87 and fucose) between macroalgal dominant sites and adjacent waters.

88

| Variable | Shapiro-Wilk W | Shapiro p-value | Levene's F | Levene p-value | ANOVA F | ANOVA p-value |
|----------|----------------|-----------------|------------|----------------|---------|---------------|
| PCHO     | 0.9372         | 0.4627          | 0.2083     | 0.6579         | 1.570   | 0.239         |
| PPRT     | 0.9200         | 0.2860          | 1.1069     | 0.3175         | 2.506   | 0.145         |
| BPC      | 0.9302         | 0.3826          | 1.0974     | 0.3195         | 0.843   | 0.380         |
| Glucose  | 0.9540         | 0.6957          | 0.5808     | 0.4636         | 0.096   | 0.763         |
| Fucose   | 0.8985         | 0.1517          | 0.1176     | 0.7387         | 0.614   | 0.451         |

89

90

91

92

93

94

95

96

97

98

99

100

101

102

103

104

105 **Table S2.** Concentration of major photosynthetic pigments (ng/L) in particulate organic matter  
 106 across various sampling stations (NA, BD, KN, HN) and depths (MDS, 500m, 1500m).

| Sample ID | Chl- C2 | Peridinin | Fucoxanthin | 19-Hex fucoxanthin | Diadinoxanthin | Chl- b | DV chl- a | Chl- a | Phaeophytin a |
|-----------|---------|-----------|-------------|--------------------|----------------|--------|-----------|--------|---------------|
| NA-MDS    | 17.5    | 19.3      | 29.4        | 15.8               | 6.7            | 171.1  | 10.2      | 57.5   | 34.8          |
| NA-500    | 10.1    | 5.0       | 19.6        | 11.2               | 3.7            | 63.5   | ND        | 26.6   | ND            |
| NA-1500   | 18.1    | 18.2      | 40.7        | 9.6                | 7.0            | 108.3  | 11.0      | 53.2   | ND            |
| BD-MDS    | 23.2    | 80.2      | 37.0        | 51.1               | 13.0           | 269.0  | 12.0      | 60.6   | ND            |
| BD-500    | 75.7    | 86.7      | 98.4        | 66.7               | 27.9           | 418.4  | 19.2      | 122.6  | 34.3          |
| BD-1500   | 9.6     | 8.4       | 20.4        | 7.1                | 3.9            | 81.7   | 7.0       | 32.1   | ND            |
| KN-MDS    | 5.3     | 6.5       | 14.3        | 15.1               | 3.5            | 83.8   | 6.7       | 32.2   | ND            |
| KN-500    | 9.6     | 6.4       | 11.5        | 17.1               | 3.6            | 107.0  | 7.1       | 38.4   | 26.0          |
| KN-1500   | 5.3     | 6.5       | 14.3        | 15.1               | 3.5            | 83.8   | 6.7       | 32.2   | 25.5          |
| HN-MDS    | 5.1     | 8.3       | 2.5         | 7.8                | 2.8            | 110.3  | 6.8       | 39.4   | 31.3          |
| HN-500    | 6.3     | 8.2       | 4.4         | 9.8                | 2.6            | 137.5  | 9.1       | 40.0   | 30.0          |
| HN-1500   | 8.7     | 8.2       | 20.1        | 22.9               | 3.5            | 198.2  | 9.6       | 58.5   | 29.3          |

107

108

109

110

111

112

113 **Table S3.** Summary of particulate biopolymeric carbon (BPC) and biochemical concentrations  
 114 (monosaccharides and amino acids) across sampling stations.

| <b>Variable</b>                                                | <b>Range<br/>(min. - max.)</b>    | <b>Minimum<br/>(Station)</b> | <b>Maximum<br/>(Station)</b> |
|----------------------------------------------------------------|-----------------------------------|------------------------------|------------------------------|
| BPC (%)                                                        | 31.7% - 60.0%                     | NA_MDS                       | NA_1500                      |
| Labile POC (%)                                                 | 17.8% - 25.7%                     | NA_MDS                       | BD_MDS                       |
| Total monosaccharide<br>concentration ( $\mu\text{g L}^{-1}$ ) | 23.4 - 78.6 $\mu\text{g L}^{-1}$  | KN_MDS                       | BD_MDS                       |
| <b>NA station</b>                                              | 29.3 - 37.0 $\mu\text{g L}^{-1}$  | NA_1500                      | NA_MDS                       |
| <b>BD station</b>                                              | 45.6 - 78.6 $\mu\text{g L}^{-1}$  | BD_1500                      | BD_MDS                       |
| <b>KN station</b>                                              | 23.4 - 34.3 $\mu\text{g L}^{-1}$  | KN_MDS                       | KN_1500                      |
| <b>HN station</b>                                              | 42.3 - 53.4 $\mu\text{g L}^{-1}$  | HN_MDS                       | HN_1500                      |
| Total amino acid<br>concentration ( $\mu\text{g L}^{-1}$ )     | 24.4 - 179.8 $\mu\text{g L}^{-1}$ | KN_1500                      | BD_MDS                       |
| <b>BD station</b>                                              | 179.8 - 74.8 $\mu\text{g L}^{-1}$ | BD_MDS                       | BD_1500                      |
| <b>KN station</b>                                              | 47.1 - 24.4 $\mu\text{g L}^{-1}$  | KN_MDS                       | KN_1500                      |
| <b>NA station</b>                                              | 45.1 - 86.7 $\mu\text{g L}^{-1}$  | NA_1500                      | NA_500                       |
| <b>HN station</b>                                              | 96.1 - 107.6 $\mu\text{g L}^{-1}$ | HN_500                       | HN_1500                      |

115

116

117

118

119

120

121

122

123

124

125

126

127

128

129 **Table S4:** Average amino acid concentration ( $\mu\text{g/L}$ ) in macroalgal dominant sites and  
130 adjacent waters

|              | Asp  | Glu  | Ser | Gly  | Thr | Arg  | Ala | Tyr | Cys | Val | Ile | Leu | Lys |
|--------------|------|------|-----|------|-----|------|-----|-----|-----|-----|-----|-----|-----|
| <b>MDS</b>   | 10.8 | 16.2 | 5.7 | 21.0 | 3.1 | 16.4 | 2.3 | 2.0 | 0.3 | 1.2 | 2.2 | 8.3 | 5.3 |
| <b>Adj-W</b> | 6.6  | 9.8  | 5.4 | 17.8 | 2.3 | 12.6 | 1.5 | 0.6 | 0.1 | 0.1 | 0.0 | 6.4 | 5.1 |

131

132

133

134

135

136

137

138

139

140

141

142

143

144

145
